1 **Genomics of viruses infecting green and purple sulfur bacteria in two euxinic lakes**

2

3 Hesketh-Best, P. J.<sup>1\*</sup>, Bosco-Santos, A.<sup>2\*</sup>, Garcia, S. L.<sup>1</sup>, Werne, J. P.<sup>3</sup>, Gilhooly III, W. P.<sup>4</sup>,

4 Silveira, C. B.<sup>1#</sup>

5

6 <sup>1</sup> Department of Biology, University of Miami, Coral Gables, FL 33146, USA.

7 <sup>2</sup> Institute of Earth Surface Dynamics, University of Lausanne, Lausanne, CH-1015, Switzerland

8 <sup>3</sup> Department of Geology & Environmental Science, University of Pittsburgh, Pittsburgh, PA,

9 15260, USA.

10 <sup>4</sup> Department of Earth Sciences, Indiana University-Purdue University Indianapolis,

11 Indianapolis, IN 46202, USA.

12 **\* These authors contributed equally to this manuscript.**

13

14 **#Correspondence to:** [cynthiasilveira@miami.edu](mailto:cynthiasilveira@miami.edu)

15

16 **Keywords:** bacteriophages, purple sulfur bacteria, green sulfur bacteria, primary production,

17 auxiliary metabolic genes

18

19 **Running title:** Viruses of phototrophic sulfur-oxidizing bacteria

20

## 21 **Abstract**

22           Viral infections of marine bacteria modulate the rates of primary production and the  
23 cycling of organic and inorganic matter in the world's oceans. Here, we investigated the  
24 hypothesis that viral infections influence the ecology of purple and green sulfur bacteria (PSB  
25 and GSB) in anoxic and sulfidic (euxinic) lakes, modern analogs of early Earth oceans. Over 200  
26 high and medium quality viral contigs were identified in long-read metagenomes from the  
27 sediments and water column of Lime Blue and Poison Lake, respectively. We compared these  
28 sequences with 94 predicted prophages identified in the complete genomes of PSB (n = 213) and  
29 GSB (n = 33). Viral genomes carrying *psbA*, encoding the small subunit of photosystem II  
30 protein, were present in all three datasets (sediment, water column, and complete genomes). The  
31 ubiquity of these genes suggests that PSB and GSB viruses interfere with the light reactions of  
32 sulfur-oxidizing autotrophs in a process similar to viral modulation of photosynthesis in  
33 Cyanobacteria. Viruses predicted to infect PSB and GSB also encoded auxiliary metabolic genes  
34 involved in reductive sulfur assimilation as cysteine, a pathway not yet described in these sulfur  
35 bacteria, as well as genes involved in pigment production (*crtF*) and carbon fixation (CP12, *zwf*,  
36 PGD). These observations highlight the potential for viral modulation of metabolic markers used  
37 as proxies to interpret biogeochemical processes in early Earth oceans.

## 38 **Introduction**

39           Before the Great Oxygenation Event, culminating 2.33 billion years ago, anoxygenic  
40 prototrophic bacteria catalyzed most marine primary production, influencing ocean stratification  
41 and the planet's oxidant balance (Kappler and Straub, 2005; Johnston *et al.*, 2009; Farquhar *et*  
42 *al.*, 2011). Our view of the biological processes mediated by microorganisms in ancient Earth  
43 has largely been informed by the assumption that there is a direct feedback between  
44 environmental gradients (such as pH, salinity, temperature, nutrients, oxygen/sulfide, carbon  
45 source, sulfate availability) and microbial community composition and distribution (Borda *et al.*,  
46 2001; Brocks *et al.*, 2005; Kappler and Straub, 2005; Brocks and Schaeffer, 2008; Johnston *et*  
47 *al.*, 2009; Farquhar *et al.*, 2011; Fakhraee *et al.*, 2019; Ozaki *et al.*, 2019; Bosco-Santos *et al.*,  
48 2020). While these assumptions may be broadly correct, they produce an aggregate view of the  
49 complexity of microbial interactions that overlooks a critical regulator of pre-GOE  
50 biogeochemical cycles. Here we propose that a largely unexplored biotic factor controls the  
51 distribution and activity of anoxygenic sulfide oxidizing phototrophs: viral infection.

52           Anoxygenic sulfide oxidizing phototrophs from green (GSB, family *Chlorobiaceae*;  
53 Garrity *et al.*, 2001) and purple (PSB, families *Chromatiaceae* and *Ectothiorhodospiraceae*;  
54 Imhoff, 2003) sulfur bacteria inhabit the euxinic photic zone, where sulfide intercepts the sunlit  
55 portions of stratified marine and lacustrine anoxic water columns. These primary producer  
56 groups have narrow environmental optimal requirements as micro-oxic to anoxic conditions, free  
57 sulfide, and sunlight, with GSB more adapted to lower light levels and PSB more tolerant to  
58 dissolved oxygen (Hamilton *et al.*, 2014). Consequently, GSB and PSB light-harvesting  
59 pigments and biomarkers are potential proxies for diagnosing basin depth and redox state in the  
60 geologic record, providing clues about past biological processes and environmental conditions

61 (Koopmans *et al.*, 1996; Brocks and Schaeffer, 2008; Brocks and Banfield, 2009). In other  
62 words, the presence or preservation (as diagenetic products) of GSB (chlorobactene and  
63 isorenieratene) and PSB (okenone) biomarkers are interpreted as deep or shallow redoxcline,  
64 respectively (Brocks *et al.*, 2005; Brocks and Schaeffer, 2008). Yet, a growing body of evidence  
65 shows that the distribution of GSB and PSB in modern water columns is not as tightly correlated  
66 to physical and chemical conditions (e.g., sulfide and light) as previously thought, suggesting  
67 that biological interactions play a significant role in defining the distribution of these phototrophs  
68 (Massé *et al.*, 2002; Hamilton *et al.*, 2014; Llorens-Marès *et al.*, 2017).

69 Bacteriophages, also known as phages, are viruses that infect bacteria and can laterally  
70 transfer genes, modulate gene expression, and control host population dynamics (Breitbart,  
71 2012). In the modern surface ocean, viral predation is responsible for the daily turnover of about  
72 25% of the bacterioplankton (Breitbart *et al.*, 2018). Viruses of modern Cyanobacteria encode  
73 genes for enzymes in the Calvin cycle, blocking carbon fixation during infection while  
74 increasing nucleotide production through the Pentose Phosphate pathway (Thompson *et al.*,  
75 2011). Most of these carbon metabolism pathways are shared between Cyanobacteria and sulfide  
76 oxidizing phototrophs, and viral interference with carbon fixation in GSB and PSB is possible. A  
77 recent study showed that lake GSB populations were concurrently infected with 2-8 viruses per  
78 cell (Berg *et al.*, 2021). One GSB host was consistently associated with two prophages with a  
79 nearly 100% infection rate for over 10 years (Berg *et al.*, 2021). GSB genomes have high  
80 signatures of horizontal gene transfer, reaching 24% of all genes in *Chlorobaculum tepidum*  
81 (Nakamura *et al.*, 2004). Likewise, phages infecting oxygenic phototrophs encode many genes  
82 involved in the synthesis of light harvesting pigments (*hol*, *pebS*, *cpeT*, *pcyA*) (Breitbart *et al.*,  
83 2018). Therefore, probing phage regulation of pigment synthesis in anoxygenic phototrophs is a

84 necessary step toward understanding the ecology of biomarker production in euxinic systems,  
85 with implications for interpreting the deep time record based on diagenetic products of pigment  
86 biomarkers.

87           Here, we identify through long-read metagenomic sequencing the genomes of viruses  
88 putatively infecting GSB and PSB inhabiting euxinic lakes. These viruses encode several genes  
89 involved in carbon fixation, sulfur metabolism, and pigment production. Based on these  
90 observations, we propose that GSB and PSB viruses manipulate host metabolism, potentially  
91 influencing these autotrophs' biogeochemical signatures in the geologic record.

92

## 93 **Methods**

### 94 *Sampling*

95           Poison Lake water column (2L) was collected from a boat using a peristaltic pump to  
96 obtain a sample from the sulfidic zone. Subsamples (50ml) were immediately frozen until further  
97 laboratory processing. In the laboratory, samples were defrosted and incubated overnight at 4 °C  
98 with Polyethylene Glycol 8000 10 %. Samples were centrifuged at 5000 g for 2 hours at 4 °C  
99 and the pellet was collected for DNA extraction with a DNeasy PowerSoil kit (Qiagen,  
100 Germany). The sediment from Lime Blue was collected with a freeze core (modified from  
101 Stocker and Williams, 1972). The sediments were sectioned within a sterile flow bench to  
102 prevent organic contamination. An archive section (~1/3 of the core's width) was preserved and  
103 stored at -80°C for future use. Sediment was collected every 2cm, for a total of 25 samples dating  
104 back to the deposition year of 1424. Sediment subsamples (1g) were extracted using the DNeasy  
105 PowerSoil kit (Qiagen, Germany), following manufacturer's instructions. Preliminary 16S  
106 sequencing of these samples revealed an abundance of anoxygenic photosynthetic bacteria in the  
107 sedimentary record of Lime Blue in the last ~580 years where it is possible to observe that above  
108 15 cm deep the relative abundance of each family increased more than 100%. The top 2cm  
109 sample was sequenced here.

110

### 111 *Long-read sequencing*

112           Metagenomic libraries were prepared using the ONT Ligation Sequencing Kit (SKQ-  
113 LSK110, Oxford Nanopore Technologies) following the manufacturer's instructions. In short,  
114 1mg of dsDNA was End-prepped and repaired to ligate a poly-A tail using the NEBNext  
115 Companion Module for Oxford Nanopore Technologies Ligation Sequencing (cat # E7180S),

116 before sequencing adaptors were ligated onto the ends. Between each step, DNA was cleaned  
117 using 1.8X Agencourt AMPure XP beads (Beckman, USA), washing the beads with 70%  
118 molecular grade Ethyl alcohol (Sigma-Aldrich, USA) before suspending in Nuclease-free water  
119 (Fisher, USA). Sequencing libraries were loaded onto and sequenced using a FLO-MINSP6 flow  
120 cell, and sequencing protocol was run for 48 hrs.

121

### 122 *Identification of viruses in metagenomes and publicly available PSB and GSB genomes*

123 ONT sequencing adaptors were trimmed using Porechop v0.2.4  
124 (<https://github.com/rrwick/Porechop>), and trimmed reads were assembled with Flye v2.9 (Lin *et*  
125 *al.*, 2016; Kolmogorov *et al.*, 2020) using the *--meta* parameter. In parallel, low quality and short  
126 reads were removed by NanoFilt v2.6.0 (De Coster *et al.*, 2018) to a minimum Q-value of 9 and  
127 length of 1 kb. Both the metaFlye contigs and quality filtered ONT reads were utilized for the  
128 detection of phages by VIBRANT v1.2.1, a bioinformatics pipeline using Hidden Markov Model  
129 (HMM) searches to identify clusters of viral genes in unknown sequences, allowing the sorting  
130 of high-confidence viral genomes and genome fragments within complex samples (Kieft *et al.*,  
131 2020).

132 Publicly available bacterial genomes with a completion level of ‘complete genome’,  
133 ‘scaffold’ and ‘contig’ belonging to the two PSB families *Chromatiaceae* (98 genomes) and  
134 *Ectothiorhodospiraceae* (115 genomes), and the GSB phyla Chlorobiota (33 genomes) were  
135 retrieved from NCBI in 2022 (Supplementary Table 1). Putative prophages were identified in  
136 these genomes using VIBRANT v1.2.1.

137 The viral genomes and genome fragments were screened for the presence of carbon,  
138 sulfur, and pigment-related auxiliary metabolic genes (AMGs) and their potential for lysogeny

139 (presence of transposases and integrases) through HMM comparisons with three databases:  
140 Pfam, VOGs, and SEED. Viral genomes containing AMGs of interest were visualized using the  
141 R package genoPlotR v0.8.11 (Guy *et al.*, 2010). For a small selection of phages containing  
142 AMGs of interest, the Max Planck Institute (MPI) HHpred server (Zimmermann *et al.*, 2018)  
143 was utilized to improve genome annotations (E-value <0.01 and Probability > 80%), in addition  
144 to the Phage Artificial Neural Networks (PhANNs, Cantu *et al.*, 2020) to confirm phage  
145 structural proteins (Confidence > 80%). To analyze the abundance and coverage of these putative  
146 viral genomes in the environment, trimmed reads were mapped to the viral contig database at  
147 high stringency (>95% identity). An outlined summary of the entire workflow can be seen in  
148 Supplementary Figure 1.



149 *Generation and quality control of MAGs*

150 Metagenome-assembled genomes (MAGs) of Bacteria were generated by mapping raw  
151 ONT reads to metaFlye contigs with Minimap2 v2.24 (Li, 2018). Subsequence .SAM files were  
152 compressed, sorted, and indexed with samtools v1.9 (Danecek *et al.*, 2021). Metagenomic bins  
153 were generated using three binning programs: CONCOCT v1.0 (Alneberg *et al.*, 2014),  
154 MetaBAT2 v2.12.1 (Kang *et al.*, 2019), and MaxBin2 v2.2.6 (Wu *et al.*, 2016). Resulting bins  
155 were refined using MetaWRAP v1.3 *bin\_refinement* module (Uritskiy *et al.*, 2018), and refined  
156 bins were assessed for contamination and completion with CheckM v1.2.0 (Parks *et al.*, 2015).  
157 Bins with  $\geq 50\%$  completion and  $\leq 10\%$  contamination were kept for further analyses. MAG  
158 depth of coverage (mean) was quantified by mapping clean reads to the metagenomic bins and  
159 taking the mean percentage of reads mapped. ONT reads and contigs were taxonomically  
160 classified by Kraken v2.0 (Wood and Salzberg, 2014; Wood *et al.*, 2019) and abundance  
161 estimated by Bracken (Bayesian Re-estimation of Abundance after Classification with Kraken)  
162 v2.7 (Lu *et al.*, 2017).

163

164 *Phylogeny and taxonomic classification of MAGs*

165 The 16S rRNA gene, if present, was extracted from MAGs and inspected for  
166 contamination directly from the genomes and metagenomic bins using ContEst16S. Neighbours  
167 for MAG 16Sr rRNA gene were determined using BLASTn against the NCBI database, and  
168 when an uncultured clone was the only match, additional BLASTn of the 16S rRNA was run  
169 against the SILVA database. Sequences were aligned using MAFFT v7.5 (Katoh *et al.*, 2002;  
170 Katoh and Standley, 2013), and a maximum-likelihood tree was generated using RAxML-NG

171 v0.9 at 200 bootstraps (Kozlov *et al.*, 2019). The tree was visualized and edited for readability  
172 using the interactive tree of life (iTOL) v6 (Letunic and Bork, 2007, 2021).

173

#### 174 *Phage host prediction*

175       Viral genomes observed within bacterial genome fragments were identified as lysogenic.  
176 Viral hosts were identified using a combination of gene homologies, the presence of tRNAs, and  
177 CRISPR (clustered regularly interspaced short palindromic repeats) spacers (Coutinho *et al.*,  
178 2017; Borges *et al.*, 2022). (I) Sequence homology matches were made from the phages  
179 identified from Lime Blue and Poison Lake to databases generated from PSB/GSB genomes  
180 retrieved from NCBI, and MAGs generated in this study using BLASTn (Camacho *et al.*, 2009).  
181 Only hits >80% sequence identity across a minimum alignment of 1,000 nucleotides were  
182 considered as possible hosts for NCBI and RefSeq genomes, and 95% sequence identity against  
183 MAGs. (II) A database was created with the CRISPR spacers from PSB, GSB genomes and  
184 MAG using minCED v0.4.3 (Mining CRISPRs in Environmental Datasets;  
185 <https://github.com/ctSkennerton/minced>), which uses CRISPR Recognition Tools (CRT) v1.2  
186 (Bland *et al.*, 2007), and sequence homology matches were made against the phages using  
187 BLASTn with the parameter *-task "blastn-short"*, hits were only considered with a maximum of  
188 2 mismatches/gaps, 100% sequenced identity, and minimum length of 20 nucleotides. (III) Phage  
189 tRNAs were detected using tRNAScan-SE v2.0 (Lowe and Chan, 2016), and matched against  
190 PSB/GSB/MAG genomes database for hits using BLASTn, a confident hit was considered at  $\geq$   
191 90% sequence identity and  $\geq$  90% coverage. (IV) Phylogenomic analysis was performed against  
192 the GL-UVAB (Gene Lineage of Uncultured Viruses of Archaea and Bacteria) reference  
193 database, as previously described (Coutinho *et al.*, 2019).

194 **Results**

195 *Bacterial community composition*

196 Nanopore sequencing generated  $3.9 \times 10^6$  reads from Lime Blue (LB) sediment and  $19.2$   
197  $\times 10^6$  reads from Poison Lake (PL) water. Trimming, quality filtering short (reads  $\leq 1000$  bp) and  
198 low-quality reads ( $Q$ -value  $< 9$ ) removed 96 and 93% of reads from LB and PL, respectively.  
199 Assemblies generated 40,807 LB contigs and 4,310 PL contigs. A broader GSB and PSB  
200 bacterial diversity was identified by taxonomic classification of reads than by metagenomic  
201 binning (Supplementary Figure 2-3). According to Kraken2 classification, clean reads from LB  
202 and PL were dominated by members of the phylum Proteobacteria (reads: 48.77% LB and  
203 70.51% PL; contigs: 45.11% LB and 59.31% PL) (Figure 1A), of which Gammaproteobacteria  
204 was the most abundant class for both. For LB sediment, at read level, LB was dominated by the  
205 anaerobic specialist order Enterobacterales (22.50%), but this was not reflected post assembly,  
206 with only 5.89% of contigs classified as Enterobacterales. For PL, the order of phototrophic  
207 sulfur bacteria Chromatiales was the most abundant Gammaproteobacteria (reads: 11.38%;  
208 contigs: 8.60%).

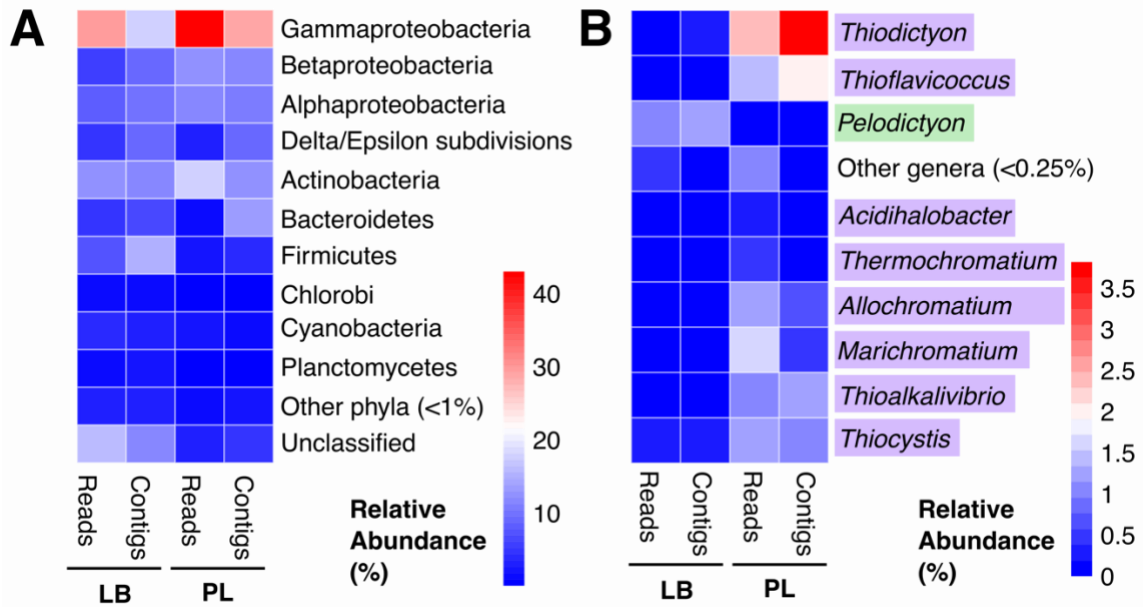

209

210 **Figure 1. Phylum and genus level taxonomic classification of reads and contigs from Lime**

211 **Blue (LB) and Poison Lake (PL).** (A) Phylum level read and contig diversity with members of

212 the phylum Proteobacteria split into class level, and (B) genus level diversity of Chlorobi,

213 *Chromatiaceae* and *Ectothiorhodospiraceae*, with PSB highlighted in purple and GSB

214 highlighted in green.

215 Within the order Chromatiales, PL water samples show higher relative abundances of

216 families *Chromatiaceae* (reads: 8.45%; contigs: 8.38%) and *Ectothiorhodospiraceae* (reads:

217 1.98%; contigs: 1.25%) and contained a variety of PSB genera in abundances ranging from

218 <0.25% to 3.82%, with *Thiodictyon* spp. (reads: 2.34%; contigs: 3.82%) being the most

219 abundant. In contrast, phototrophic sulfur bacteria represented a smaller fraction of the

220 metagenomic dataset in LB sediment, with a greater abundance of GSB from phylum Chlorobi

221 (reads: 1.26%; contigs: 1.24%) than PSB, order Chromatiales (reads: 0.83%; contigs: 1.05%).

222 The genera *Pelodictyon* spp. was the most abundant GSB (reads: 0.10%; contigs: 1.15%), and

223 *Thiocystis* spp. (reads: 0.25%; contigs: 0.36%) was the most abundant PSB.

224

225 *Bacterial MAG recovery and phylogeny*

226 Bacterial genomes were binned from LB sediment and PL water assemblies, resulting in  
 227 17 MAGs with a minimum completion of 50% and maximum contamination of 10% (Table 1).  
 228 Of these MAGs, seven were classified as high quality ( $\geq 70\%$  completion,  $\leq 10\%$  contamination).  
 229 The most abundant MAG, as measured by mean coverage of Nanopore reads mapped to the bins,  
 230 was the PL\_bin01 (mean = 2.74%), classified as a potential PSB belonging to the genera  
 231 *Thiohalocapsa*, and LB\_bin03 (mean = 0.11%), classified as Candidatus Komeilibacteria (Supp.  
 232 Figure 2).

233 **Table 1. Taxonomy and quality of MAGs.** Quality was estimated by CheckM and taxonomy  
 234 by 16S rRNA gene using the SILVA ACT service. Values above the threshold for a high-quality  
 235 MAG are denoted in bold ( $\geq 70\%$  completion, and  $\leq 10\%$  contamination). (\*) denotes potential  
 236 PSB MAG, and (†) denotes a MAG identified as potential host to a phage by CRISPR spacers.  
 237 (Comp., bin completeness; Contam., bin contamination; Strain het., proportion of the  
 238 contamination that originates from the same or similar strains)

| Bin      | CheckM Marker lineage | 16S rRNA placement base on the SILVA-ACT |                                 | Comp. | Contam. | Strain het. | Mean cov. (%) |
|----------|-----------------------|------------------------------------------|---------------------------------|-------|---------|-------------|---------------|
|          |                       | Phylum                                   | Lowest taxonomic classification |       |         |             |               |
| LB_bin01 | k_Bacteria (UID2569)  | Spirochaetota                            | g_Treponema                     | 60.12 | 1.10    | 0.00        | 0.009         |
| LB_bin02 | k_Bacteria (UID2569)  | Latescibacterota                         | p_Latescibacterota              | 58.63 | 1.10    | 0.00        | 0.016         |
| LB_bin03 | k_Bacteria (UID2569)  | Patescibacteria                          | o_Candidatus Komeilibacteria    | 62.23 | 0.00    | 0.00        | 0.106         |
| LB_bin04 | k_Bacteria (UID2569)  | Latescibacterota                         | o_WCHB1-41                      | 55.01 | 1.10    | 0.00        | 0.011         |
| LB_bin05 | k_Bacteria (UID2569)  | No 16S rRNA gene detected                |                                 | 70.8  | 4.65    | 33.33       | 0.015         |
| LB_bin06 | k_Bacteria (UID2569)  | Verrucomicrobiota                        | p_Verrucomicrobiota             | 36.55 | 3.49    | 0.00        | 0.008         |
| LB_bin07 | k_Bacteria (UID2569)  | Chloroflexi                              | o_MSBL5 (contaminated)          | 74.72 | 7.59    | 20.0        | 0.005         |
| LB_bin08 | k_Bacteria (UID2569)  | No 16S rRNA gene detected                |                                 | 61.32 | 2.63    | 16.67       | 0.018         |
| LB_bin09 | k_Bacteria (UID2569)  | k_Archaea                                | f_Candidatus Iainarchaeum       | 56.63 | 0.00    | 0.00        | 0.005         |
| LB_bin10 | k_Bacteria (UID2569)  | Bacteroidota                             | g_Ignavibacterium               | 58.8  | 3.03    | 28.57       | 0.012         |

|            |                                 |                           |                                |       |      |       |       |
|------------|---------------------------------|---------------------------|--------------------------------|-------|------|-------|-------|
| LB_bin11   | p_Bacteroidetes (UID2605)       | No 16S rRNA gene detected |                                | 59.05 | 9.14 | 0.00  | 0.005 |
| PL_bin01*† | c_Gammaproteobacteria (UID4274) | Proteobacteria            | g_Thiohalocapsa (Chromatiales) | 85.17 | 1.17 | 40.0  | 2.724 |
| PL_bin02   | k_Bacteria (UID2569)            | Latescibacterota          | o_WCHB1-41                     | 76.74 | 3.05 | 9.09  | 0.009 |
| PL_bin03   | k_Bacteria (UID2569)            | Deinococcota              | g_Truepera                     | 76.11 | 2.97 | 71.43 | 0.010 |
| PL_bin04   | c_Deltaproteobacteria (UID3217) | Desulfobacterota          | g_Desuloanatronum              | 89.53 | 0.60 | 100   | 0.016 |
| PL_bin05   | k_Bacteria (UID2569)            | Planctomycetota           | f_KCLunmb-38-53                | 82.29 | 3.42 | 11.11 | 0.027 |
| PL_bin06   | k_Bacteria (UID2569)            | No 16S rRNA gene detected |                                | 68.8  | 0.00 | 0.00  | 0.01  |

239

## 240 Diversity of PSB-infecting phages

241 From publicly available PSB and GSB genomes, VIBRANT identified a total of 32  
 242 phages of high quality (HQ), 36 of medium quality (MQ) and 183 of low quality (LQ). Of the  
 243 HQ and MQ phages, 64 were from Chromatiales genomes (33 *Chromatidales* phages, and 31  
 244 *Ectothiorhodospiraceae*). The majority (63) of HQ and MQ phages were classified as lysogenic,  
 245 and of the eight phages classified as lytic, three were complete/circular. No Chlorobi phages  
 246 were identified as lysogenic, indicating the absence of known integration enzymes in these  
 247 integrated prophages identified within their hosts' genomes. In total, four complete genomes  
 248 were predicted, one from the GSB *Chlorobium limicola* strain Frassasi, one from *Thiocystis*  
 249 *violacea* strain DSM 207, and two from *Thiohalocapsa* sp. ML1 and *Halochromatium roseum*  
 250 DSM 18859.

251 From the metagenomic sequences, VIBRANT identified 2,742 phages from LB contigs  
 252 (100 MQ phages and 24 HQ phages). From PL metagenomic reads, 5,806 phages were  
 253 identified, all of which were LQ phages. Two phages were classified as complete and circular  
 254 from LB and none from PL. Contigs did not improve the quality of predicted phages in PL, and  
 255 filtered PL reads were utilized for further viral analyses.

256 Bacterial MAGs and publicly available PSB and GSB genomes were utilized to predict  
 257 hosts of PSB- and GSB-infecting phages using a combination of BLASTn against PSB and GSB

258 genomes, CRISPR-spacers of the putative host and, if available, tRNA sequences (Supp. Table  
259 2). Homology matches against a database of PSB/GSB genomes predicted hosts for 5,451 phages  
260 (12 LB phages, and 5,439 PL), with the most common host for phages from both samples being  
261 *Chromatium weissei* DSM 5161. Homology matches against MAGs resulted in 547 high  
262 confidence predictions, with the PSB PL\_bin01 (*Thiohalocapsa* sp.) and the PL\_bin04  
263 (*Desuloanatronum* sp.) as the most common predicted phage hosts. High confidence phage-host  
264 linkages based on CRISPR-spacer homology matches with 100% identity, and > 20 nucleotide  
265 coverage predicted hosts for 54 phages (44 LB phages, and 10 PL phages). The most common  
266 host for LB phages was *Ectothiorhodospira* spp., while for PL phages predicted hosts included  
267 *Allochromatium* spp., *Chlorobium* spp. and *Thiohalocapsa* spp. Homology matches to a database  
268 of tRNA sequences only yielded four predictions, with *Thiohalocapsa* sp. ML1 being the only  
269 predicted hosts for three PL phages, and *Thiorhodovibrio winogradskyi* strain 6511 for one LB  
270 phage.

271 The LB and PL phages were compared to reference viral genomes using clustering based  
272 on gene sharing distance (Coutinho *et al.*, 2019) (Figure 2). Most LB phages and PSB and GSB  
273 phage clusters had long branch lengths, evidence of low similarity between phages predicted by  
274 VIBRANT in this study and the reference viral genomes (Supplementary Figure 4). Several  
275 clusters were formed exclusively of LB phages. Only one cluster of LB phages closely relates to  
276 a predicted phage from PSB genomes, despite clustering with reference GL-UVAB phages with  
277 PSB hosts. This may indicate that many of the phages detected in this study infect  
278 uncharacterized bacterial hosts. The GL-UVAB viruses related to the viruses identified here  
279 infected *Chromatidales* and *Ectothiorhodospiraceae*, with the taxonomy of most hosts



280 unresolved beyond family level, including viruses of *Thioalkalivibrio*, *Thiorhodococcus*, and  
281 *Thiorhodovibrio*.

282

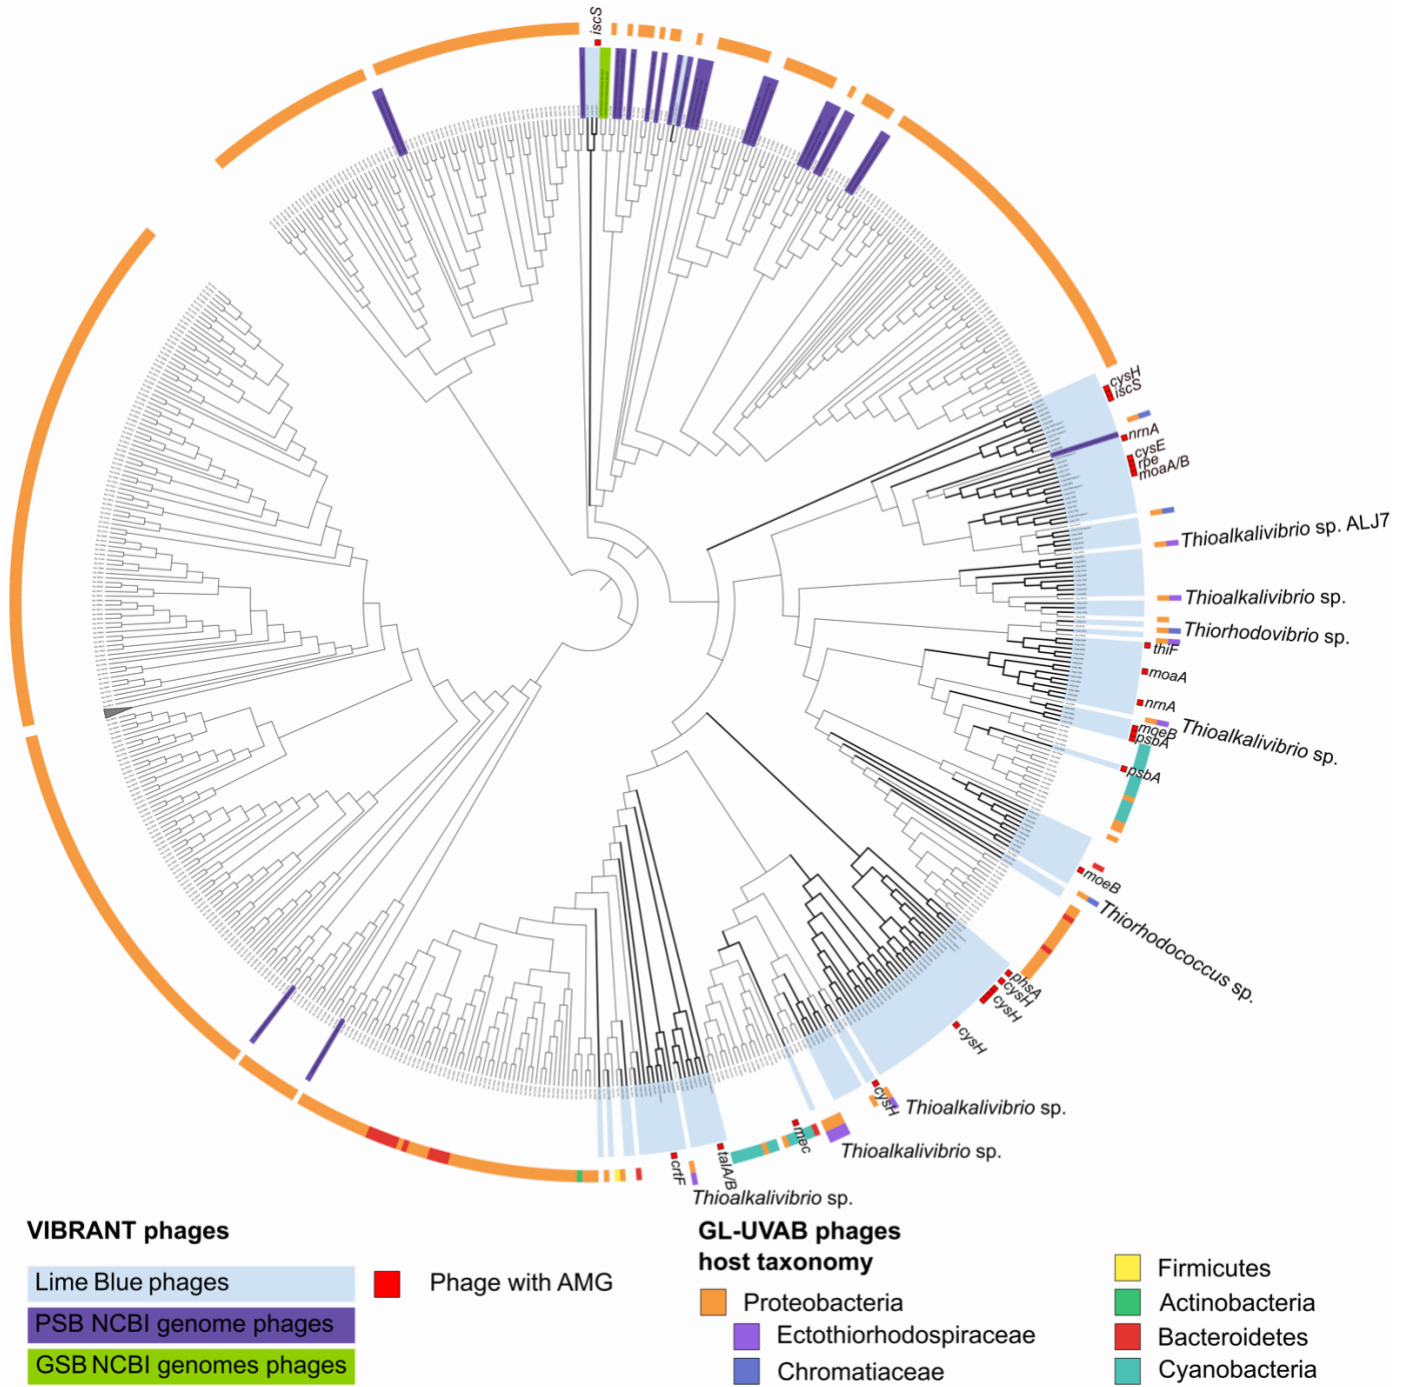

283



284 **Figure 2. Clustering of VIBRANT phages from LB metagenome (blue) and PSB genomes**  
285 **(purple) and GSB genomes (green) and the reference phage genomes based on their gene-**  
286 **sharing Dice distances.** The VIBRANT phages from Lime Blue, many of which contained  
287 AMGs of interest (inner ring), form novel branches with low similarity to reference phage  
288 genomes. Where known, the host genera of the reference PSB infecting phage were listed. The  
289 branch lengths are ignored to better display clustering topology, for a version displaying branch  
290 length, see Supplementary Figure 4.

291 *Phage AMGs influencing diverse metabolic pathways*

292 A total of 52 and 96 AMGs were detected from PL and LB phages respectively, with the  
293 AMGs representing 153 distinct KEGG pathways, including photosynthesis, sulfur metabolism  
294 and relay, pigment synthesis, Calvin Cycle, and Pentose Phosphate Pathway (PPP) (Figure 3A).  
295 Five phages from the *Chromatidales* genomes contained AMGs involved in sulfur metabolism  
296 and relay (*cysH*, *moeB*, and *mec*). The bacterial hosts of these phages included *C. weisse* DSM  
297 5161 (*cysH* and *mec*), *T. violacea* DSM 207 (*cysH*), *Thiospirillum jenense* DSM 216 (*moeB*), and  
298 *Allochromatium humboldtianum* DSM 21881 (*mec*). The phages predicted from *T. jenense* and  
299 *A. humboldtianum* encoding AMGs were classified as lysogenic. A single lysogenic phage from  
300 an *Ectothiorhodospirales* genome contained a *cysH* that was detected from the plasmid pTK9001  
301 of *Thioalkalivibrio* sp. K90mix. A single lytic phage from the GSB *Chlorobium limicola* strain  
302 Frasassi contained the CP12 gene involved in blocking carbon fixation through the Calvin Cycle  
303 in Cyanobacteria.

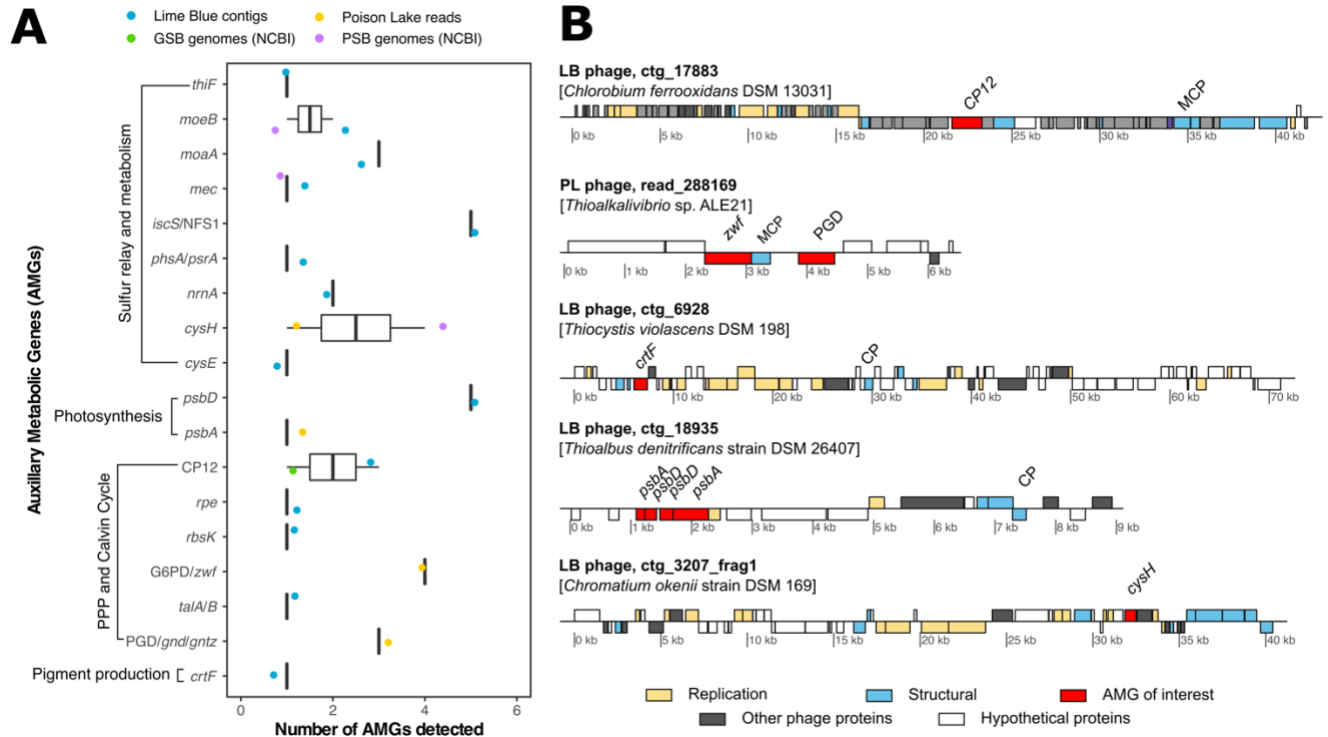

304

305 **Figure 3. (A) AMG abundances and (B) genome maps of putative phages containing AMGs**

306 **of interest.** AMGs were identified by VIBRANT except for CP12, which was identified by

307 BLASTp of phage ORFs to a database of available CP12 proteins from UniProt. Putative hosts

308 identified based on CRISPR spacers are indicated for each phage (LB, Lime Blue; PL, Poison

309 Lake; MCP; major capsid protein; CP; putative capsid protein)

310 LB phages encoded several AMGs involved in sulfur metabolism (*cysE*, *nrnA* and *psbA*)

311 and sulfur relay (*moeB*, *thiF* and *iscS*). While most of the AMGs were detected in phages

312 predicted to be lytic, four LB lysogenic phages contained a copy of *cysH*, *moeA*, and *nrnA*. No

313 PL phages were observed to contain sulfur metabolism or relay AMGs. AMGs related to

314 photosynthesis (*psbA* and *psbD*) were present in both PL and LB lytic phages, with four phages

315 containing multiple copies of the AMGs that were adjacently positioned, such as was seen for

316 LB phage contig\_18935 (Figure 3B). A copy of the *crtF* gene, part of the okenone synthesis

317 pathway of pigment production was identified in a putative lytic phage. Among the phages with

318 AMGs of interest, three LB phage-host linkages could be made with high confidence based on  
319 CRISPR-spacer homology matches, two were predicted to infect the GSB *Chlorobium*  
320 *chlorochromatii* CaD3 (encoding *moeB* and *iscS*), and one infecting *Pararheinheimera soli* BD-  
321 d46 (encoding *nrnA*). From the lower confidence matches (100% identity, 18-20 nucleotide  
322 coverage, and <2 mismatches), we identified nine LB phage-host pairings among the phages  
323 with AMGs of interest. This included the *crtF*-containing LB phage (contig\_6928) predicted to  
324 infect the PSB *Thiocystis violascens* DSM 198, a lysogenic phage with two copies of *cysH*  
325 (contig\_11073) predicted to infect the GSB *Chlorobium phaeobacteroides* DSM 266, and a  
326 phage with *thiF* (contig\_43205) infecting the PSB *Arsukibacterium* sp. MJ3.

327 **Discussion**

328 Here we identified viral genomes recovered from LB and PL metagenomes that include  
329 novel lineages infecting GSB and PSB, as evidenced by the long branch lengths during  
330 phylogenomic analysis (Supplementary Figure 4). Many of these novel phage lineages include  
331 phages with AMGs with potential to modify hosts' metabolism and ecology. From this  
332 preliminary work on two proxy lakes in the Pacific Northwest, we propose that bacteriophages  
333 have the potential to affect the distribution and the energetic metabolism of GSB and PSB by  
334 modulating (I) light harvesting molecule production, (II) carbon fixation, and (III) sulfur  
335 metabolism (Figure 4).

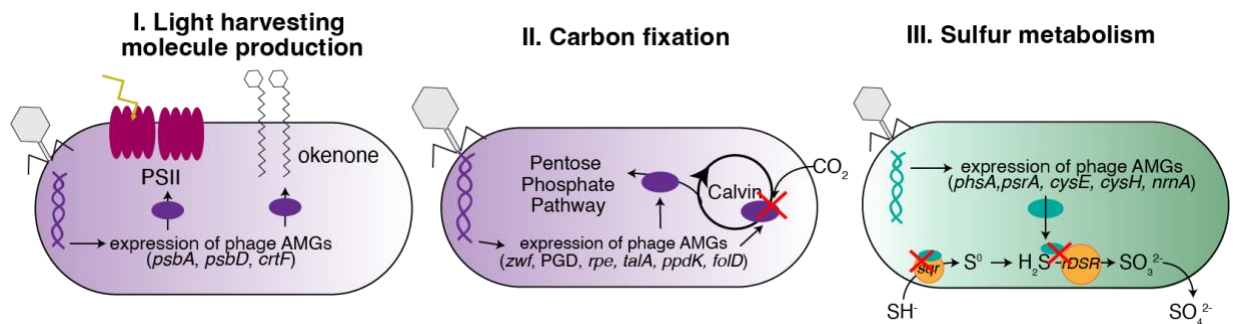

336

337 **Figure 4. Conceptual hypotheses for viral infection influence on PSB and GSB**

338 **communities.** Viral predation and gene transfer affect the biosignatures of PSB and GSB by  
339 modulating their I. pigment production; III. carbon fixation; and III. sulfur metabolism.

340 *Viruses encode pigment and reaction center genes*

341 Ecological distributions of GSB and PSB in euxinic water bodies and the presence or  
342 preservation of their light harvesting biomarkers (i.e., chlorobactene, isorenieratene, okenone,  
343 and their diagenetic products) in the fossil record as proxies of photic zone euxinia (Brocks *et al.*,  
344 2005; Brocks and Schaeffer, 2008) are not fully explained by physical and chemical bottom-up  
345 controls. Our metagenomes from LB and PL presented an alternative explanation for this  
346 observation, as we identified a putative viral genome encoding a gene for the second-to-last step  
347 in okenone synthesis (*crtF*) (Vogl and Bryant, 2011) and predicted to infect the PSB *T.*  
348 *violascens* DSM 198 (Figure 3B). We hypothesize that viral-encoded auxiliary metabolic genes  
349 may increase the production of okenone by PSB in LB, despite the dominance of GSB in this  
350 lake. If true, this work will have important implications for interpretation of the deep time record  
351 of the diagenetic products of pigment biomarkers. This hypothesis is consistent with previous  
352 work showing that horizontal gene transfer in Lake Banyoles (Spain) results in the unexpected  
353 synthesis of BChl *e* and isorenieratene by *Chlorobium luteolum*, a bacterium that usually  
354 synthesizes BChl *c* (Llorens-Marès *et al.*, 2017). This gene transfer event offered fitness  
355 advantage to *C. luteolum* over green-coloured GSB by expansion of photo-adaptation range in a  
356 deep basin. GSB genomes have high signatures of horizontal gene transfer, reaching 24% of all  
357 genes in *Chlorobaculum tepidum* (Nakamura *et al.*, 2004). We also identified putative viral  
358 genome fragments carrying genes encoding the D1 and D2 subunits of the PSII (*psbA* and *psbD*).  
359 By modifying light reaction rates through the expression of these genes, viral infection could  
360 indirectly affect the metabolism of pigment molecules associated with reaction centers.

361 *Viruses encode carbon fixation genes*

362 PSB and GSB are the main autotrophs in euxinic lakes, yet their abundances are  
363 unreliable proxies for photosynthetic activity, as demonstrated in Lake Cadagno, Switzerland  
364 (Musat *et al.*, 2008). In one growing season, the PSB *C. okenii* accounted for only 0.3% of cell  
365 abundance and 70% of the carbon uptake. In subsequent growing seasons, GSB became  
366 dominant, representing 95% of the community, but the PSB *T. syntrophicum* was responsible for  
367 25.9% of carbon fixation (Storelli *et al.*, 2013). Given that PSB are more depleted in  $^{13}\text{C}$  than  
368 GSB using the same carbon source, their carbon isotope fractionation patterns can be used to  
369 determine the relative contributions of PSB and GSB to photosynthetic production (Posth *et al.*,  
370 2017). During a spring bloom in Lake Cadagno three PSB strains contributed 38% to the bulk  
371 isotope signal while a single GSB contributed 62%. By fall, these PSB strains contributed 55%  
372 to the bulk isotope signal, while a single GSB contributed 45% (Posth *et al.*, 2017). Seasonal  
373 changes in the relative contribution of PSB and GSB activity to carbon isotope composition were  
374 positively correlated with cell counts (GSB were dominant in October) but had unexplained  
375 relationships with pigment concentration (Bchl a increased and Bchl e decreased). Viral  
376 infections that increase rates of light reactions of photosynthesis while lowering carbon fixation  
377 by inhibiting the Calvin Cycle, as observed in cyanophages, could explain this pattern (Figure 4,  
378 Thompson *et al.*, 2011).

379 The reductive pentose phosphate and reverse tricarboxylic acid cycle pathways utilized  
380 for carbon fixation in PSB and GSB, respectively, are shared with Cyanobacteria (Sirevåg, 1995;  
381 Tabita, 1995). Phage infections of Cyanobacterial hosts alter light reactions, the Calvin Cycle,  
382 the PPP and nucleotide biosynthesis through the expression of AMGs (e.g., *rpi*, *talC*, *tkt* and *can*;  
383 Breitbart *et al.*, 2018). Viral infections can shut down carbon fixation while maintaining or even

384 supplementing light reactions to support phage replication (Sullivan *et al.*, 2010; Philosof *et al.*,  
385 2011; Thompson *et al.*, 2011; Puxty *et al.*, 2016). Therefore, viral modification of host  
386 photosynthetic machinery could be the source of unexplained patterns of carbon isotope  
387 fractionation observed in PSB and GSB. Our metagenomic analysis of LB and PL identified viral  
388 AMGs capable of interfering with the Calvin Cycle (CP12) and PPP (PGD, G6PD, *tal*; Figure 3).  
389 These observations suggest that carbon fixation rates, and therefore carbon isotope fractionation  
390 by GSB and PSB, can be modified by viral infection similar to the phage modification of  
391 Cyanobacterial carbon metabolism.

392

### 393 *Viruses encode sulfur cycling genes*

394 Phototrophic sulfur bacteria oxidize inorganic sulfur compounds under anaerobic  
395 conditions. All phototrophic *Chromatiaceae* and most *Ectothiorhodospira* and GSB oxidize  
396 sulfide and elemental sulfur to sulfate, using them as electron donors for photosynthesis  
397 (Frigaard and Dahl, 2009). In our metagenomic survey of LB and PL, we found phage genomes  
398 encoding at least nine genes involved in sulfur metabolism and relay system, including genes  
399 involved in sulfur assimilation as cysteine (*cysH*, *mec*) and genes involved in the synthesis of  
400 molybdopterin, a cofactor in sulfite reduction.

401 We hypothesize that these viral genes deviate sulfur from the bacterial energetic  
402 metabolism towards amino acid synthesis for viral particle production. If true, viruses have the  
403 potential to modify environmental sulfur isotopic fractionation that is used in the interpretation  
404 of sulfur cycling in the geologic record. This is because the combined effects of sulfide  
405 oxidation, sulfate reduction and disproportionation influence the apparent fractionation between  
406 sulfate and sulfide isotopes (Brabec *et al.*, 2012; Zerkle *et al.*, 2012; Pellerin *et al.*, 2015; Findlay

407 et al., 2019). In euxinic lakes, isotopes of elemental sulfur are expected to correlate with  
408 photosynthetic activity (sulfide consumption) and sulfate reduction (sulfide production)  
409 (Hamilton *et al.*, 2014). Viruses encoding genes that deviate sulfur from energetic metabolism  
410 towards viral particle production may significantly modify the apparent sulfur fractionation. The  
411 presence of the gene *cysE* (serine biosynthesis) in putative phage genomes predicted to infect  
412 PSB in LB supports this hypothesis (Figure 3).

413         Additionally, several putative phage genomes encoding *cysH* in LB and PL may affect  
414 assimilatory sulfate reduction. *CysH* encodes a reductase that catalyzes the conversion of  
415 phosphoadenosine phosphosulfate to sulfite and is repressed under photoautotrophic growth  
416 using hydrogen sulfide as electron donor and derepressed under conditions of sulfate deficiency  
417 in PSB (Haverkamp and Schwenn, 1999). Phage alteration of this fine enzymatic regulation is a  
418 potential source of deviations in sulfur isotope fractionation.

419

## 420         **Conclusion**

421         Here we describe hundreds of novel putative viral genomes from modern euxinic lakes  
422 that are analogs of early Earth oceans. We identified widespread PSB and GSB phage infections  
423 with the potential to regulate pigment production, photosynthesis, carbon fixation and sulfur  
424 metabolism, suggesting that these viruses can affect host physiology and ecology. Our  
425 preliminary observations impact the interpretation of paleoecology, paleochemistry and  
426 paleosedimentation based on biological signatures of PSB and GSB in the geologic record.



427           **Availability of data and materials**

428           The Nanopore metagenomic sequencing data generated for this study for Lime Blue  
429 sediment (SRS13178833) and Poison Lake water (SRS13178834) is available in the Sequence  
430 Reads Archives (SRA) repository, under the BioProject PRJNA842402.

431           **Acknowledgements**

432           We thank Molly O'Beirne for comments and discussions about the decoupling between  
433 PSB and GSB activity, abundance and biomarkers.

434           **Funding**

435           Samples were collected through funding from a Purdue Research Foundation Research  
436 Grant to W. P. Gilhooly and a National Science Foundation grant to J. P. Werne [EAR-1424170]  
437 and W. P. Gilhooly [EAR-1424228]. Sequencing was funded by PI C.B. Silveira's start up fund  
438 from the University of Miami. Computational analyses were funded by the University of Miami  
439 Institute for Data Science and Computing – grant “Expanding the Use of Collaborative Data  
440 Science” to C.B. Silveira.

441           **Authors contributions**

442           A. Bosco-Santos and C.B. Silveira designed the study. A. Bosco-Santos, W. Gilhooly and  
443 J. Werne collected samples and extracted DNA. S. Garcia and C. B. Silveira sequenced samples.  
444 P.J. Hesketh-Best performed bioinformatics analyses and data visualisation. First draft was  
445 written by A. Bosco-Santos, P.J. Hesketh-Best, and C.B. Silveira. All authors contributed to  
446 editing the manuscript.

447 **Supplementary data**

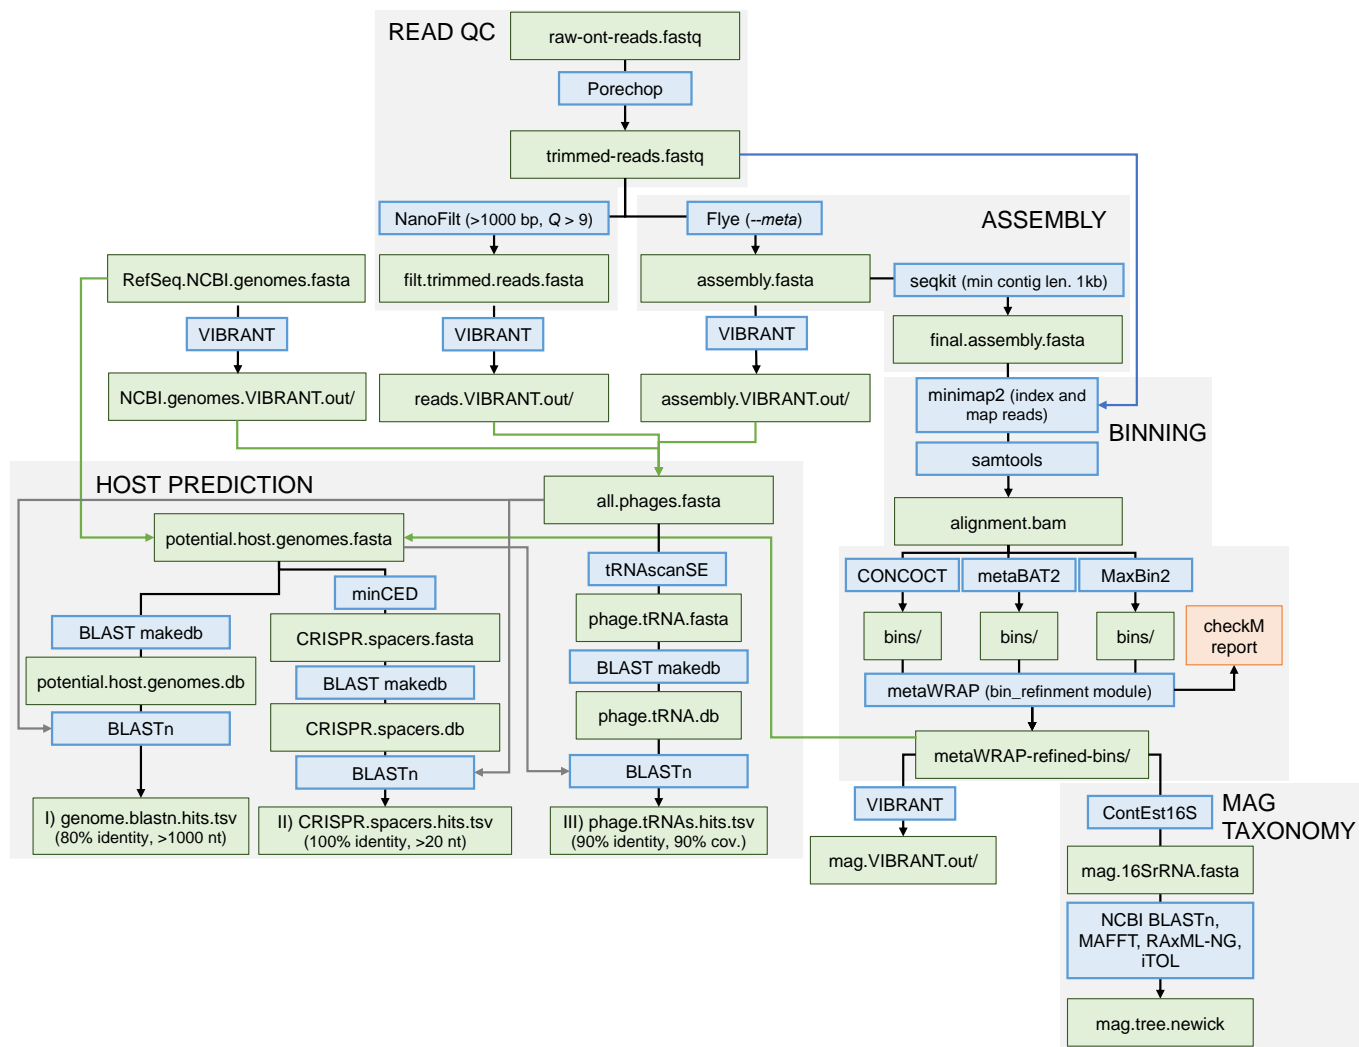

448

449 **Supplementary Figure 1.** Workflow outline of metagenomic analysis conducted as part of this

450 study.

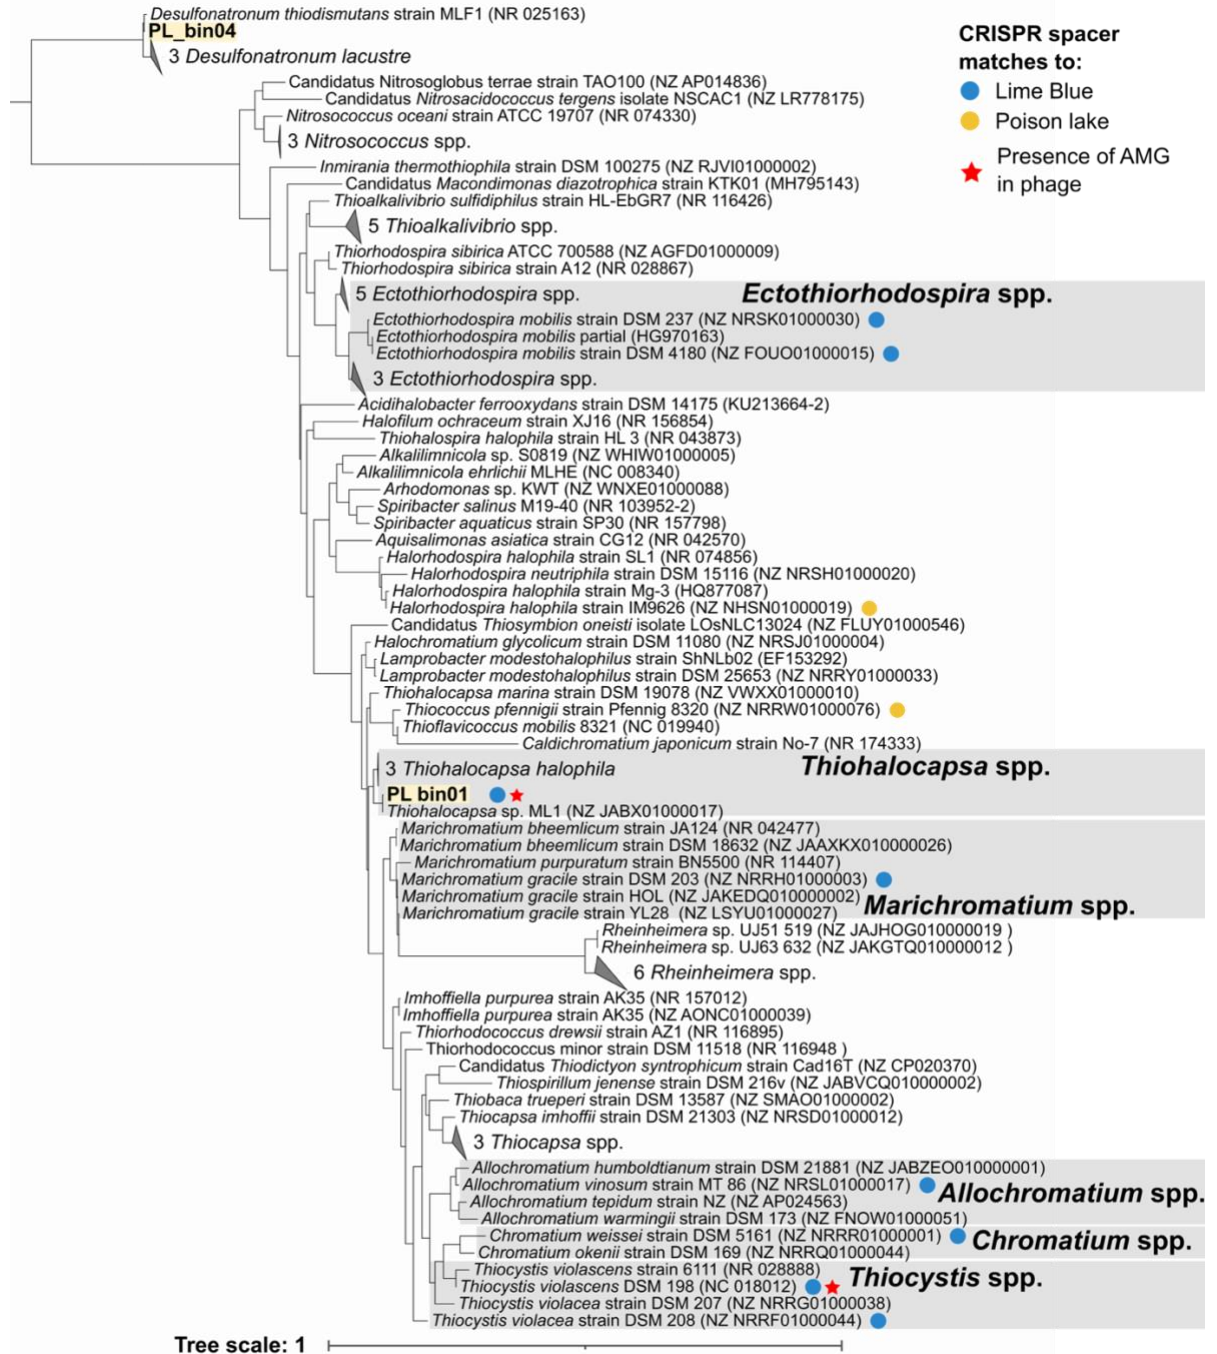

451

452 **Supplementary Figure 2.** Phylogenetic tree of phages, and MAG phylogeny displaying phage

453 hosts from the PSB as predicted by CRISPR spacer matches (minimum length 20 nt; 100%

454 identity, maximum of 2 mismatches/gaps).

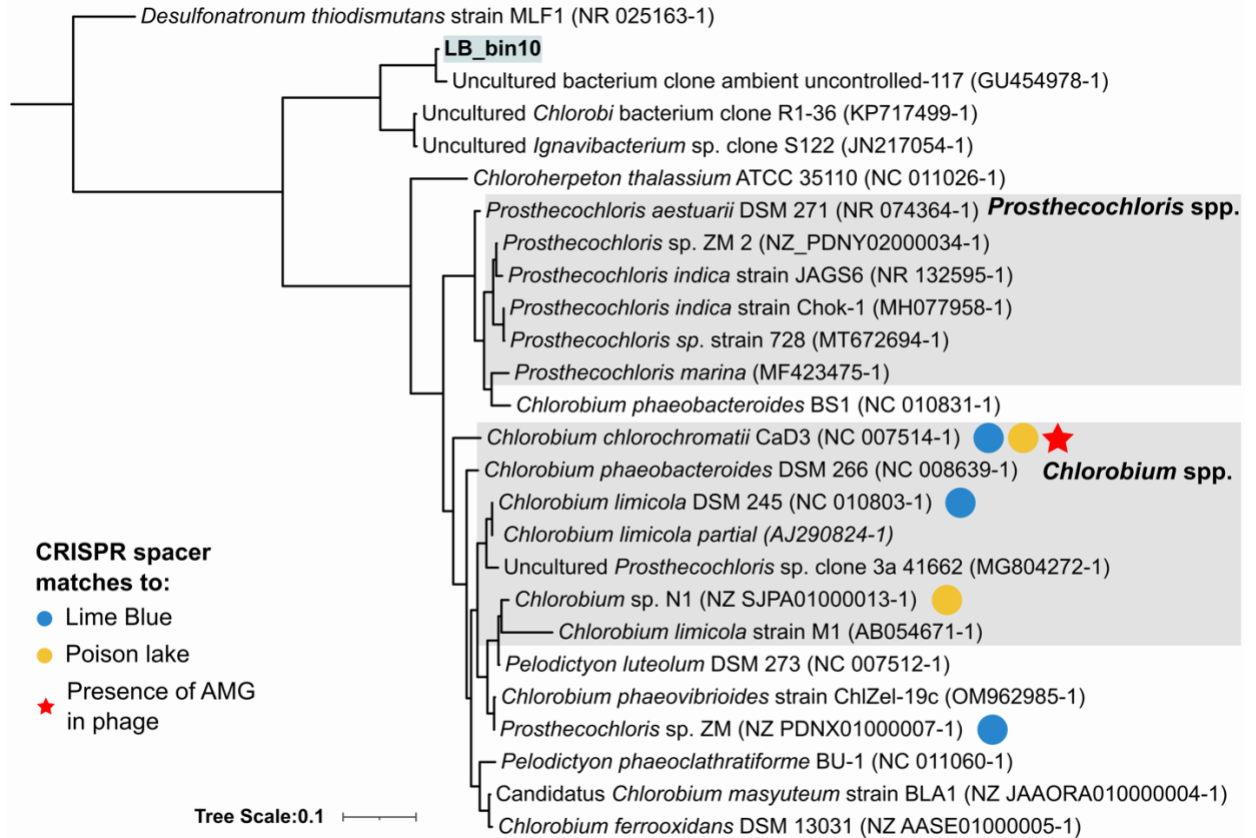

455

456 **Supplementary Figure 3.** Phylogenetic tree of phages, and MAG phylogeny displaying phage

457 hosts from the GSB as predicted by CRISPR spacer matches (minimum length 20 nt; 100%

458 identity, maximum of 2 mismatches/gaps).

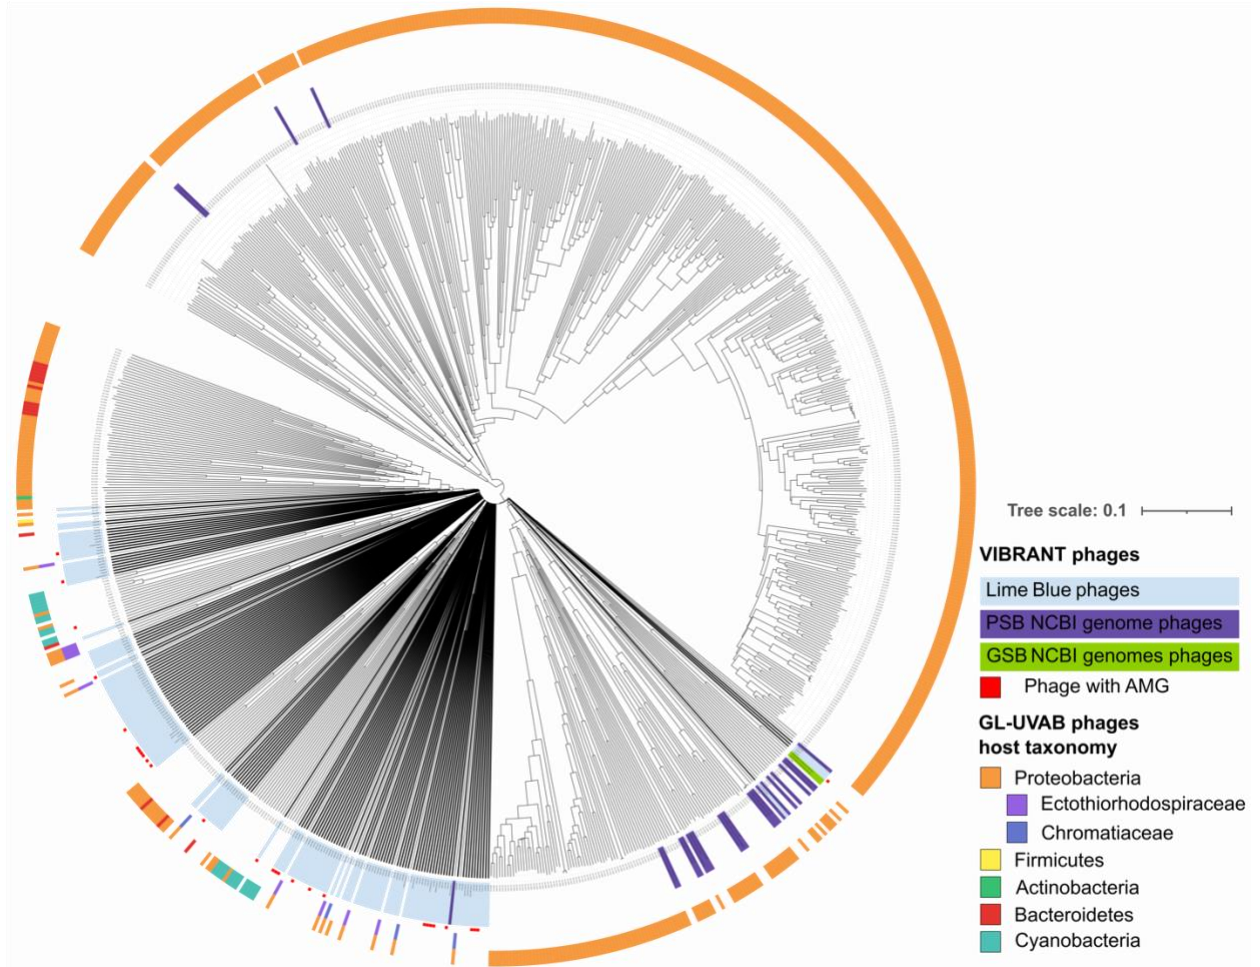

459

460 **Supplementary Figure 4.** Clustering of VIBRANT identified phages from LB metagenome and  
461 PSB genomes GSB genomes and the reference phage genomes based on their Dice distance with  
462 supporting branch lengths.

463 **Supplementary Table 1.** Summary of purple and green sulfur bacteria genomes retrieved from  
464 the National Centre for Biotechnology Informations (NCBI).

465 **Supplementary Table 2.** Complete results of the predicted phage hosts pairings by sequence  
466 homology marches of complete genomes, CRISPR-spacers and tRNA sequences.



467 **References**

- 468 Alneberg, J., Bjarnason, B.S., De Bruijn, I., Schirmer, M., Quick, J., Ijaz, U.Z., et al. (2014)  
469 Binning metagenomic contigs by coverage and composition. **11**: 1144–1146.
- 470 Berg, M., Goudeau, D., Olmsted, C., McMahon, K.D., Yitbarek, S., Thweatt, J.L., et al. (2021)  
471 Host population diversity as a driver of viral infection cycle in wild populations of green  
472 sulfur bacteria with long standing virus-host interactions. *ISME J* **15**: 1569–1584.
- 473 Bland, C., Ramsey, T.L., Sabree, F., Lowe, M., Brown, K., Kyrpides, N.C., and Hugenholtz, P.  
474 (2007) CRISPR Recognition Tool (CRT): A tool for automatic detection of clustered  
475 regularly interspaced palindromic repeats. *BMC Bioinformatics* **8**: 1–8.
- 476 Borda, M.J., Elsetinow, A.R., Schoonen, M.A., and Strongin, D.R. (2001) Pyrite-induced  
477 hydrogen peroxide formation as a driving force in the evolution of photosynthetic  
478 organisms on an early earth. *Astrobiology* **1**: 283–288.
- 479 Borges, A.L., Lou, Y.C., Sachdeva, R., Al-Shayeb, B., Penev, P.I., Jaffe, A.L., et al. (2022)  
480 Widespread stop-codon recoding in bacteriophages may regulate translation of lytic genes.  
481 *Nat Microbiol* **7**: 918–927.
- 482 Bosco-Santos, A., Gilhooly, W.P., Fouskas, F., Fabricio-Silva, W., and Oliveira, E.P. (2020)  
483 Euxinia in the Neoproterozoic: The starting point for early oxygenation in a Brazilian Craton.  
484 *Precambrian Research* **341**: 105655.
- 485 Brabec, M.Y., Lyons, T.W., and Mandernack, K.W. (2012) Oxygen and sulfur isotope  
486 fractionation during sulfide oxidation by anoxygenic phototrophic bacteria. *Geochimica et*  
487 *Cosmochimica Acta* **83**: 234–251.
- 488 Breitbart, M. (2012) Marine viruses: truth or dare. *Ann Rev Mar Sci* **4**: 425–448.

- 489 Breitbart, M., Bonnain, C., Malki, K., and Sawaya, N.A. (2018) Phage puppet masters of the  
490 marine microbial realm. *Nat Microbiol* **3**: 754–766.
- 491 Brocks, J.J. and Banfield, J. (2009) Unravelling ancient microbial history with community  
492 proteogenomics and lipid geochemistry. *Nat Rev Microbiol* **7**: 601–609.
- 493 Brocks, J.J., Love, G.D., Summons, R.E., Knoll, A.H., Logan, G.A., and Bowden, S.A. (2005)  
494 Biomarker evidence for green and purple sulphur bacteria in a stratified Palaeoproterozoic  
495 sea. *Nature* 2005 437:7060 **437**: 866–870.
- 496 Brocks, J.J. and Schaeffer, P. (2008) Okenane, a biomarker for purple sulfur bacteria  
497 (Chromatiaceae), and other new carotenoid derivatives from the 1640 Ma Barney Creek  
498 Formation. *Geochimica et Cosmochimica Acta* **72**: 1396–1414.
- 499 Camacho, C., Coulouris, G., Avagyan, V., Ma, N., Papadopoulos, J., Bealer, K., and Madden,  
500 T.L. (2009) BLAST+: Architecture and applications. *BMC Bioinformatics* **10**: 1–9.
- 501 Cantu, V.A., Salamon, P., Seguritan, V., Redfield, J., Salamon, D., Edwards, R.A., and Segall,  
502 A.M. (2020) PhANNs, a fast and accurate tool and web server to classify phage structural  
503 proteins. *PLOS Computational Biology* **16**: e1007845.
- 504 De Coster, W., D’Hert, S., Schultz, D.T., Cruts, M., and Van Broeckhoven, C. (2018) NanoPack:  
505 visualizing and processing long-read sequencing data. *Bioinformatics* **34**: 2666–2669.
- 506 Coutinho, F.H., Edwards, R.A., and Rodríguez-Valera, F. (2019) Charting the diversity of  
507 uncultured viruses of Archaea and Bacteria. *BMC Biology* **17**: 1–16.
- 508 Coutinho, F.H., Silveira, C.B., Gregoracci, G.B., Thompson, C.C., Edwards, R.A., Brussaard,  
509 C.P.D., et al. (2017) Marine viruses discovered via metagenomics shed light on viral  
510 strategies throughout the oceans. **8**: 1–12.

- 511 Danecek, P., Bonfield, J.K., Liddle, J., Marshall, J., Ohan, V., Pollard, M.O., et al. (2021)  
512 Twelve years of SAMtools and BCFtools. *Gigascience* **10**: 1–4.
- 513 Fakhraee, M., Hancisse, O., Canfield, D.E., Crowe, S.A., and Katsev, S. (2019) Proterozoic  
514 seawater sulfate scarcity and the evolution of ocean–atmosphere chemistry. *Nature*  
515 *Geoscience* 2019 12:5 **12**: 375–380.
- 516 Farquhar, J., Zerkle, A.L., and Bekker, A. (2011) Geological constraints on the origin of  
517 oxygenic photosynthesis. *Photosynthesis Research* **107**: 11–36.
- 518 Findlay, A.J., Boyko, V., Pellerin, A., Avetisyan, K., Guo, Q., Yang, X., and Kamyshny, A.  
519 (2019) Sulfide oxidation affects the preservation of sulfur isotope signals. *Geology* **47**: 739–  
520 743.
- 521 Frigaard, N.U. and Dahl, C. (2009) Sulfur metabolism in phototrophic sulfur bacteria. *Adv*  
522 *Microb Physiol* **54**: 103–200.
- 523 Garrity, G.M., Holt, J.G., Overmann, J., Pfennig, N., Gibson, J., and Gorlenko, V.M. (2001)  
524 Phylum BXI. Chlorobi . *Bergey's Manual® of Systematic Bacteriology* 601–623.
- 525 Guy, L., Kultima, J.R., Andersson, S.G.E., and Quackenbush, J. (2010) genoPlotR: comparative  
526 gene and genome visualization in R. *Bioinformatics* **26**: 2334–2335.
- 527 Hamilton, T.L., Bovee, R.J., Thiel, V., Sattin, S.R., Mohr, W., Schaperdoth, I., et al. (2014)  
528 Coupled reductive and oxidative sulfur cycling in the phototrophic plate of a meromictic  
529 lake. *Geobiology* **12**: 451–468.
- 530 Haverkamp, T. and Schwenn, J.D. (1999) Structure and function of a cysBJIH gene cluster in the  
531 purple sulphur bacterium *Thiocapsa roseopersicina*. *Microbiology (N Y)* **145**: 115–125.



- 532 Imhoff, J.F. (2003) Phylogenetic taxonomy of the family Chlorobiaceae on the basis of 16S  
533 rRNA and fmo (Fenna-Matthews-Olson protein) gene sequences. *International Journal of*  
534 *Systematic and Evolutionary Microbiology* **53**: 941–951.
- 535 Johnston, D.T., Wolfe-Simon, F., Pearson, A., and Knoll, A.H. (2009) Anoxygenic  
536 photosynthesis modulated Proterozoic oxygen and sustained Earth’s middle age. *Proc Natl*  
537 *Acad Sci U S A* **106**: 16925–16929.
- 538 Kang, D.D., Li, F., Kirton, E., Thomas, A., Egan, R., An, H., and Wang, Z. (2019) MetaBAT 2:  
539 An adaptive binning algorithm for robust and efficient genome reconstruction from  
540 metagenome assemblies. *PeerJ* **2019**: e7359.
- 541 Kappler, A. and Straub, K.L. (2005) Geomicrobiological Cycling of Iron. *Reviews in Mineralogy*  
542 *and Geochemistry* **59**: 85–108.
- 543 Katoh, K., Misawa, K., Kuma, K.I., and Miyata, T. (2002) MAFFT: a novel method for rapid  
544 multiple sequence alignment based on fast Fourier transform. *Nucleic Acids Research* **30**:  
545 3059–3066.
- 546 Katoh, K. and Standley, D.M. (2013) MAFFT Multiple Sequence Alignment Software Version  
547 7: Improvements in Performance and Usability. *Molecular Biology and Evolution* **30**: 772.
- 548 Kieft, K., Zhou, Z., and Anantharaman, K. (2020) VIBRANT: Automated recovery, annotation  
549 and curation of microbial viruses, and evaluation of viral community function from  
550 genomic sequences. *Microbiome* **8**: 1–23.
- 551 Kolmogorov, M., Bickhart, D.M., Behsaz, B., Gurevich, A., Rayko, M., Shin, S.B., et al. (2020)  
552 metaFlye: scalable long-read metagenome assembly using repeat graphs. *Nature Methods*  
553 *2020 17:11* **17**: 1103–1110.

- 554 Koopmans, M.P., Köster, J., van Kaam-Peters, H.M.E., Kenig, F., Schouten, S., Hartgers, W.A.,  
555 et al. (1996) Diagenetic and catagenetic products of isorenieratene: Molecular indicators for  
556 photic zone anoxia. *Geochimica et Cosmochimica Acta* **60**: 4467–4496.
- 557 Kozlov, A.M., Darriba, D., Flouri, T., Morel, B., and Stamatakis, A. (2019) RAxML-NG: a fast,  
558 scalable and user-friendly tool for maximum likelihood phylogenetic inference.  
559 *Bioinformatics* **35**: 4453–4455.
- 560 Letunic, I. and Bork, P. (2007) Interactive Tree Of Life (iTOL): an online tool for phylogenetic  
561 tree display and annotation. *Bioinformatics* **23**: 127–128.
- 562 Letunic, I. and Bork, P. (2021) Interactive Tree Of Life (iTOL) v5: an online tool for  
563 phylogenetic tree display and annotation. *Nucleic Acids Research* **49**: W293–W296.
- 564 Li, H. (2018) Minimap2: pairwise alignment for nucleotide sequences. *Bioinformatics* **34**: 3094–  
565 3100.
- 566 Lin, Y., Yuan, J., Kolmogorov, M., Shen, M.W., Chaisson, M., and Pevzner, P.A. (2016)  
567 Assembly of long error-prone reads using de Bruijn graphs. *Proc Natl Acad Sci U S A* **113**:  
568 E8396–E8405.
- 569 Llorens-Marès, T., Liu, Z., Allen, L.Z., Rusch, D.B., Craig, M.T., Dupont, C.L., et al. (2017)  
570 Speciation and ecological success in dimly lit waters: horizontal gene transfer in a green  
571 sulfur bacteria bloom unveiled by metagenomic assembly. *ISME J* **11**: 201–211.
- 572 Lowe, T.M. and Chan, P.P. (2016) tRNAscan-SE On-line: integrating search and context for  
573 analysis of transfer RNA genes. *Nucleic Acids Res* **44**: W54–W57.
- 574 Lu, J., Breitwieser, F.P., Thielen, P., and Salzberg, S.L. (2017) Bracken: estimating species  
575 abundance in metagenomics data. *PeerJ Computer Science* **3**: e104.

- 576 Massé, A., Pringault, O., and De Wit, R. (2002) Experimental study of interactions between  
577 purple and green sulfur bacteria in sandy sediments exposed to illumination deprived of  
578 near-infrared wavelengths. *Applied and Environmental Microbiology* **68**: 2972–2981.
- 579 Musat, N., Halm, H., Winterholler, B., Hoppe, P., Peduzzi, S., Hillion, F., et al. (2008) A single-  
580 cell view on the ecophysiology of anaerobic phototrophic bacteria. *Proc Natl Acad Sci U S*  
581 *A* **105**: 17861–17866.
- 582 Nakamura, Y., Itoh, T., Matsuda, H., and Gojobori, T. (2004) Biased biological functions of  
583 horizontally transferred genes in prokaryotic genomes. *Nat Genet* **36**: 760–766.
- 584 Ozaki, K., Thompson, K.J., Simister, R.L., Crowe, S.A., and Reinhard, C.T. (2019) Anoxygenic  
585 photosynthesis and the delayed oxygenation of Earth’s atmosphere. *Nature*  
586 *Communications* 2019 10:1 **10**: 1–10.
- 587 Parks, D.H., Imelfort, M., Skennerton, C.T., Hugenholtz, P., and Tyson, G.W. (2015) CheckM:  
588 assessing the quality of microbial genomes recovered from isolates, single cells, and  
589 metagenomes. *Genome Research* **25**: 1043–1055.
- 590 Pellerin, A., Bui, T.H., Rough, M., Mucci, A., Canfield, D.E., and Wing, B.A. (2015) Mass-  
591 dependent sulfur isotope fractionation during reoxidative sulfur cycling: A case study from  
592 Mangrove Lake, Bermuda. *Geochimica et Cosmochimica Acta* **C**: 152–164.
- 593 Philosof, A., Battchikova, N., Aro, E.M., and Béjà, O. (2011) Marine cyanophages: tinkering  
594 with the electron transport chain. *The ISME Journal* **5**: 1568.
- 595 Posth, N.R., Bristow, L.A., Cox, R.P., Habicht, K.S., Danza, F., Tonolla, M., et al. (2017)  
596 Carbon isotope fractionation by anoxygenic phototrophic bacteria in euxinic Lake Cadagno.  
597 *Geobiology* **15**: 798–816.

- 598 Puxty, R.J., Millard, A.D., Evans, D.J., and Scanlan, D.J. (2016) Viruses Inhibit CO<sub>2</sub> Fixation in  
599 the Most Abundant Phototrophs on Earth. *Current Biology* **26**: 1585–1589.
- 600 Sirevåg, R. (1995) Carbon Metabolism in Green Bacteria. *Anoxygenic Photosynthetic Bacteria*  
601 871–883.
- 602 Storelli, N., Peduzzi, S., Saad, M.M., Frigaard, N.U., Perret, X., and Tonolla, M. (2013) CO<sub>2</sub>  
603 assimilation in the chemocline of Lake Cadagno is dominated by a few types of  
604 phototrophic purple sulfur bacteria. *FEMS Microbiol Ecol* **84**: 421–432.
- 605 Sullivan, M.B., Huang, K.H., Ignacio-Espinoza, J.C., Berlin, A.M., Kelly, L., Weigele, P.R., et  
606 al. (2010) Genomic analysis of oceanic cyanobacterial myoviruses compared with T4-like  
607 myoviruses from diverse hosts and environments. *Environmental Microbiology* **12**: 3035–  
608 3056.
- 609 Tabita, F.R. (1995) The Biochemistry and Metabolic Regulation of Carbon Metabolism and CO  
610 Fixation in Purple Bacteria. *Anoxygenic Photosynthetic Bacteria* 885–914.
- 611 Thompson, L.R., Zeng, Q., Kelly, L., Huang, K.H., Singer, A.U., Stubbe, J.A., and Chisholm,  
612 S.W. (2011) Phage auxiliary metabolic genes and the redirection of cyanobacterial host  
613 carbon metabolism. *Proc Natl Acad Sci U S A* **108**:
- 614 Uritskiy, G. v., Diruggiero, J., and Taylor, J. (2018) MetaWRAP - A flexible pipeline for  
615 genome-resolved metagenomic data analysis 08 Information and Computing Sciences 0803  
616 Computer Software 08 Information and Computing Sciences 0806 Information Systems.  
617 *Microbiome* **6**: 1–13.
- 618 Vogl, K. and Bryant, D.A. (2011) Elucidation of the Biosynthetic Pathway for Okenone in  
619 *Thiodictyon* sp. CAD16 Leads to the Discovery of Two Novel Carotene Ketolases. *The*  
620 *Journal of Biological Chemistry* **286**: 38521.

- 621 Wood, D.E., Lu, J., and Langmead, B. (2019) Improved metagenomic analysis with Kraken 2.  
622 *Genome Biology* **20**: 1–13.
- 623 Wood, D.E. and Salzberg, S.L. (2014) Kraken: Ultrafast metagenomic sequence classification  
624 using exact alignments. *Genome Biology* **15**: 1–12.
- 625 Wu, Y.W., Simmons, B.A., and Singer, S.W. (2016) MaxBin 2.0: an automated binning  
626 algorithm to recover genomes from multiple metagenomic datasets. *Bioinformatics* **32**:  
627 605–607.
- 628 Zerkle, A.L., Claire, M.W., Domagal-Goldman, S.D., Farquhar, J., and Poulton, S.W. (2012) A  
629 bistable organic-rich atmosphere on the Neoproterozoic Earth. *Nature Geoscience* **5**:  
630 359–363.
- 631 Zimmermann, L., Stephens, A., Nam, S.Z., Rau, D., Kübler, J., Lozajic, M., et al. (2018) A  
632 Completely Reimplemented MPI Bioinformatics Toolkit with a New HHpred Server at its  
633 Core. *Journal of Molecular Biology* **430**: 2237–2243.
- 634
